# Supplementary material for: Acoustic and optical methods to infer water transparency at Time Series Station Spiekeroog, Wadden Sea
Source: Copernicus journal article supplement (doi:10.5194/os-12-1155-2016), 2016-11-04
Supplement: Supplementary file 1 [file os-12-1155-2016-supplement.zip]

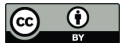

## *Supplement of*

# **Acoustic and optical methods to infer water transparency at Time Series Station Spiekeroog, Wadden Sea**

**Anne-Christin Schulz et al.**

*Correspondence to:* Oliver Zielinski ([oliver.zielinski@uni-oldenburg.de](mailto:oliver.zielinski@uni-oldenburg.de))

- [os-12-1155-2016-supplement-title-page.pdf](#)
- [data\\_schulz\\_et\\_al\\_2016.csv](#)

The copyright of individual parts of the supplement might differ from the CC-BY 3.0 licence.
